# Supplementary material
Source: PubMed Central journal article supplement (PMC2685360)
Supplement: 00795.2008_2.pdf [file 00795.2008_2.pdf]

## Legends to supplemental figures

### **Suppl. Figure 1. Effects of DOX±peroxynitrite scavengers on time course of myocardial iNOS expression, 3-nitrotyrosine formation and caspase 3/7 activity *in vivo*.**

Upper panels: Effects of scavengers on the time course of DOX-induced myocardial iNOS protein expressions. \**P* <0.05 vs. vehicle, #*P*<0.05 vs DOX; n=4/group

Middle panel: Effects of scavengers on the time course of DOX-induced nitrotyrosine formation from heart lysate measured by ELISA. For quantitative data, \**P* <0.05 vs. vehicle, #*P*<0.05 vs DOX; n=6/group.

Bottom panel: Effects of scavengers on the time course of DOX-induced cleaved caspase 3/7 activity from heart lysate. For quantitative data, \**P* <0.05 vs. vehicle, #*P*<0.05 vs DOX; n=6/group.

### **Suppl. Figure 2. Time course of the myocardial dysfunction *in vivo* following DOX (20 mg/kg. i.p.) administration**

The DOX-induced depression of cardiac function is evident after day 3, which corresponds to markedly increased myocardial nitrotyrosine formation and cell death (see also suppl. Fig. 1)

Results are mean±SEM of 6 to 10 experiments in each group. \**P*<0.05 vs vehicle.

### **Suppl. Figure 3. Effects of DOX±peroxynitrite scavengers on myocardial eNOS, nNOS expressions *in vivo*.**

Effects of DOX±peroxynitrite scavengers on myocardial eNOS and nNOS protein and mRNA expressions 5 days following the drug treatments. \**P* <0.05 vs. vehicle, #*P*<0.05 vs DOX; n=6/group for protein samples and n=9 for mRNA samples.

**Suppl. Figure 4. Effects of DOX±peroxynitrite scavengers on mitochondrial membrane potential measured by TMRE *in vitro*.** The yellow color in the bottom line shows colocalization of mitotracker green (green color, upper line) with TMRE (red color, middle line).

### **Suppl. Figure 5. Effects of DPI, apocynin, allopurinol and SOD-PEG on DOX induced cell death.**

Cell death was measured in H9c2 cardiomyocytes treated with 5µM DPI, 200 µM apocynin, 10 µM allopurinol and 3000U/ml cell permeable SOD-PEG in the presence or without DOX. \**P* <0.05 vs. vehicle, #*P*<0.05 vs DOX; n=4/group.

**Suppl. Figure 6. Effects of catalase-PEG on DOX and hydrogen peroxide (H<sub>2</sub>O<sub>2</sub>)-induced cell death.**

A) Effects of catalase-PEG on DOX-induced apoptosis and necrosis measured by flow cytometry in H9c2 cardiomyocytes. Representative data from 4 experiments analyzed. \**P* <0.05 vs. vehicle, #*P*<0.05 vs DOX;

B) Effects of Catalase-PEG on H<sub>2</sub>O<sub>2</sub>-induced apoptosis and necrosis measured by flow cytometry in H9c2 cardiomyocytes. Representative data from 4 experiments analyzed. \**P* <0.05 vs. vehicle, #*P*<0.05 vs DOX.

**Suppl. Figure 7. Effects of nitric oxide donors on DOX-induced apoptosis/necrosis *in vitro*.**

Effects of nitric oxide donors SNP and SIN-1 (50 and 20 μM) on DOX-induced apoptosis/necrosis measured by flow cytometry in H9c2 cardiomyocytes. Representative data from 4 experiments analyzed. \**P* <0.05 vs. vehicle, # *P*<0.05 vs DOX; n=4/group.

**Suppl. Figure 8: Effects of NO donor on DOX-induced nitrotyrosine formation measured by flow cytometry in H9c2.**

Effect of NO donor on DOX-induced nitrotyrosine formation in H9c2 measured by flow cytometry. Peroxynitrite (ONOO<sup>-</sup>) at 100μM for 2h was used as positive control in flow cytometry. \**P* <0.05 vs. vehicle, # *P*<0.05 vs DOX; n=4/group.
